# Supplementary material for: Hierarchical NiCo2O4/NiFe/Pt heterostructures supported on nickel foam as bifunctional electrocatalysts for efficient oxygen/hydrogen production
Source: Royal Society of Chemistry journal article supplement (doi:10.1039/c9ra07012e), 2019-01-01
Supplement: c9ra07012e1.pdf [file c9ra07012e1.pdf]

## Supplementary Information

### **Hierarchical NiCo<sub>2</sub>O<sub>4</sub>/NiFe/Pt Heterostructures Supported on Nickel Foam as Bifunctional Electrocatalysts for Efficient Oxygen/Hydrogen Production**

*Qingyou Huang,<sup>a</sup> Yang Cao,<sup>c, d</sup> Xiaohong Wang,<sup>d</sup> Jinchun Tu,<sup>d</sup> Qianfeng Xia,<sup>b,\*1</sup> and Qiang Wu<sup>a,\*2</sup>*

*<sup>a</sup> Key Laboratory of Emergency and Trauma of Ministry of Education & Research Unit of Island Emergency Medicine of Chinese Academy of Medical Sciences, Hainan Medical University, Haikou Hainan 571199, P. R. China.*

*<sup>b</sup> Key Laboratory of Tropical Translational Medicine of Ministry of Education & School of Tropical Medicine and Laboratory Medicine, Hainan medical University, Haikou, Hainan 571199, P. R. China.*

*<sup>c</sup> Qiongtai Normal University, Haikou 571127, Hainan, P. R. China*

*<sup>d</sup> State Key Laboratory of Marine Resource Utilization in South China Sea, School of Materials Science and Engineering, Hainan University, Haikou 570228, P. R. China.*

---

<sup>1</sup>E-mail address: xiaqianfeng@sina.com

<sup>2</sup>E-mail address: wuqiang001001@aliyun.com

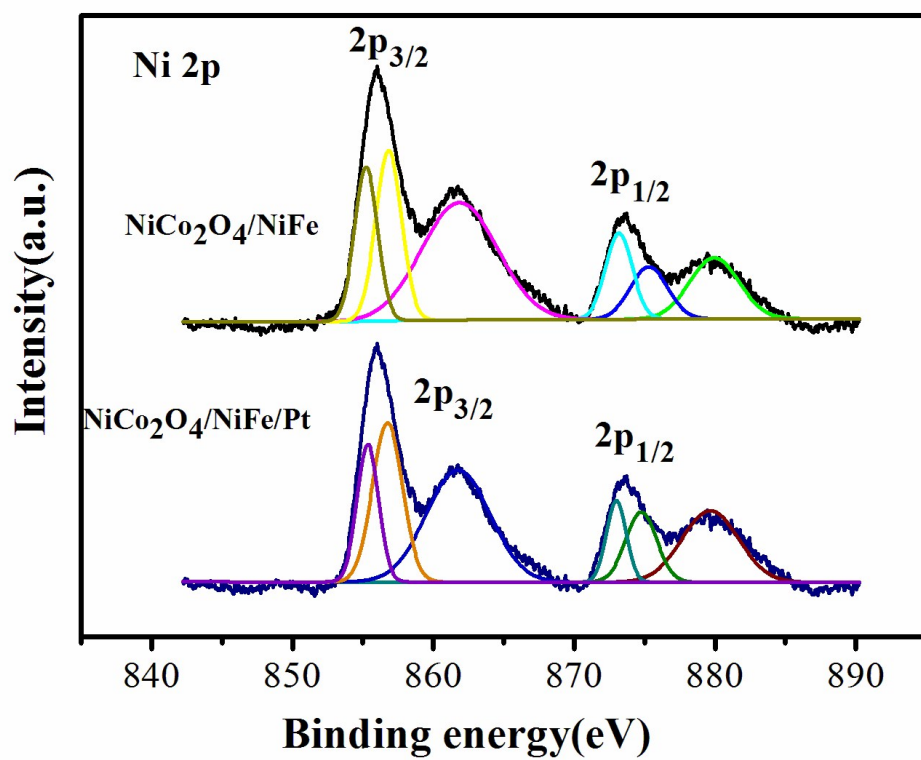

Fig. S1 High-resolution XPS spectra for Ni 2p.

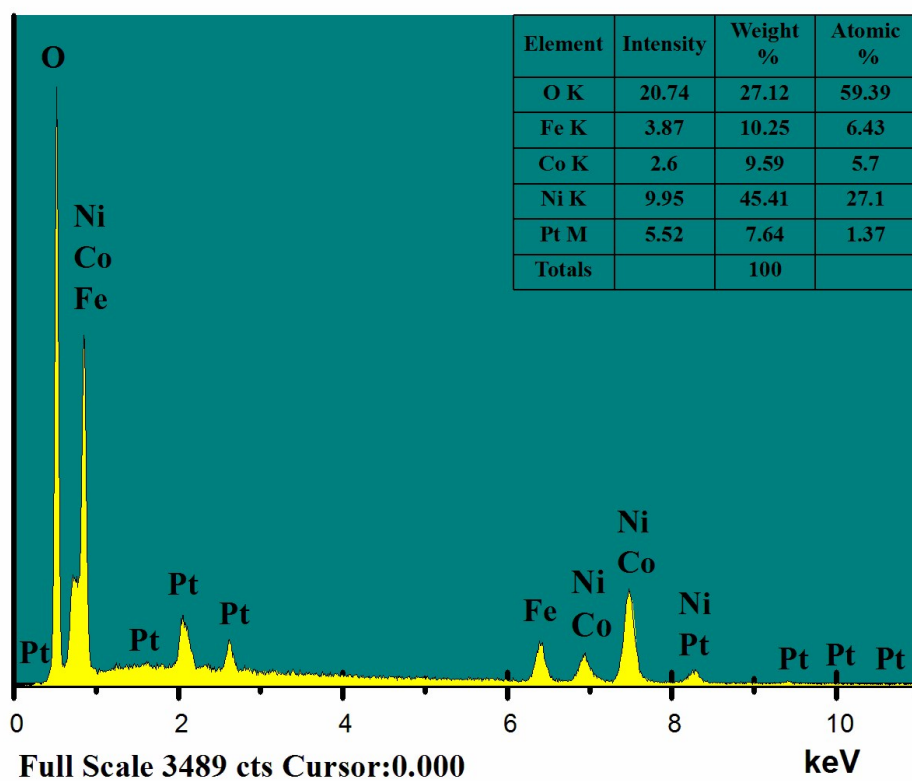

Fig. S2. EDS spectra of (a) the NiCo<sub>2</sub>O<sub>4</sub>/NiFe/Pt arrays (inset showing atomic percentage).

The energy dispersive X-ray spectra (EDS) for NiCo<sub>2</sub>O<sub>4</sub>/NiFe/Pt arrays are shown in Fig. S2, demonstrates that the arrays are mainly constituted by O, Fe, Co, Ni, and Pt elements. The EDS results confirmed the formation of Pt nanoparticles and attachment on NiCo<sub>2</sub>O<sub>4</sub>/NiFe with a weight fraction of about 7.64%.
